# Supplementary material
Source: PubMed Central journal article supplement (PMC8627516)
Supplement: NIHMS1709343-supplement-1.pdf [file NIHMS1709343-supplement-1.pdf]

Supplementary Table 1: Sociodemographic characteristics and health behaviors by categories of sugar-sweetened beverage consumption among healthy adults (n=2,706), NHANES 2017-18

|                                            | Total       | Sugar-sweetened beverage consumption |                            |                             |                        | P       |
|--------------------------------------------|-------------|--------------------------------------|----------------------------|-----------------------------|------------------------|---------|
|                                            |             | 0 servings<br>(n=985)                | >0-1<br>serving<br>(n=560) | >1-2<br>servings<br>(n=531) | >2 servings<br>(n=630) |         |
| Age, mean (SE)                             | 37.9 (0.6)  | 41.9 (1.2)                           | 38.3 (1.3)                 | 32.9 (1.1)                  | 34.7 (0.8)             | <0.0001 |
| Family income to needs ratio, mean (SE)    | 3.0 (0.1)   | 3.5 (0.1)                            | 3.0 (0.2)                  | 2.8 (0.1)                   | 2.5 (0.1)              | <0.0001 |
| Healthy Eating Index-2015 score, mean (SE) | 50.8 (0.8)  | 55.0 (0.7)                           | 53.7 (1.2)                 | 47.6 (0.8)                  | 43.4 (0.8)             | <0.0001 |
| Female                                     | 1353 (47.4) | 530 (54.7)                           | 336 (55.0)                 | 253 (42.4)                  | 234 (32.0)             | <0.0001 |
| Race/ethnicity                             |             |                                      |                            |                             |                        | 0.01    |
| Non-Hispanic White                         | 898 (60.0)  | 343 (63.2)                           | 169 (58.5)                 | 156 (58.8)                  | 230 (56.9)             |         |
| Non-Hispanic Black                         | 656 (11.5)  | 170 (8.1)                            | 142 (10.4)                 | 161 (14.9)                  | 183 (15.7)             |         |
| Hispanic                                   | 608 (17.3)  | 188 (14.7)                           | 134 (19.5)                 | 137 (18.3)                  | 149 (18.8)             |         |
| Other                                      | 544 (11.2)  | 284 (13.9)                           | 115 (11.6)                 | 77 (8.1)                    | 68 (8.5)               |         |
| Education                                  |             |                                      |                            |                             |                        | <0.0001 |
| <12 years                                  | 289 (6.4)   | 99 (4.9)                             | 44 (4.4)                   | 56 (8.1)                    | 90 (9.7)               |         |
| High school diploma or equivalent          | 458 (21.7)  | 146 (18.1)                           | 87 (21.8)                  | 98 (23.4)                   | 127 (26.5)             |         |
| Some college                               | 694 (26.4)  | 259 (27.6)                           | 138 (21.9)                 | 126 (30.0)                  | 171 (25.1)             |         |
| College graduate or higher                 | 562 (28.4)  | 320 (40.1)                           | 116 (31.4)                 | 66 (13.8)                   | 60 (17.5)              |         |
| Missing                                    | 703 (17.1)  | 161 (9.3)                            | 175 (20.5)                 | 185 (24.7)                  | 182 (21.2)             |         |
| Smoking status                             |             |                                      |                            |                             |                        | <0.0001 |
| Never smoker                               | 1384 (55.5) | 574 (59.7)                           | 285 (57.0)                 | 250 (54.1)                  | 275 (48.0)             |         |
| Former smoker                              | 402 (18.2)  | 191 (23.8)                           | 67 (14.6)                  | 72 (16.3)                   | 72 (13.4)              |         |
| Current smoker                             | 373 (13.2)  | 104 (9.9)                            | 70 (13.3)                  | 55 (9.1)                    | 144 (22.6)             |         |
| Missing                                    | 547 (13.0)  | 116 (6.6)                            | 138 (15.1)                 | 154 (20.6)                  | 139 (16.0)             |         |
| Vigorous activity in past week             |             |                                      |                            |                             |                        | <0.0001 |
| No                                         | 1460 (54.1) | 536 (50.7)                           | 290 (56.8)                 | 266 (49.8)                  | 368 (61.1)             |         |
| Yes                                        | 699 (32.9)  | 333 (42.7)                           | 132 (28.1)                 | 111 (29.6)                  | 123 (22.9)             |         |

|                                      |             |            |            |            |            |         |
|--------------------------------------|-------------|------------|------------|------------|------------|---------|
| Missing                              | 547 (13.0)  | 116 (6.6)  | 138 (15.1) | 154 (20.6) | 139 (16.0) |         |
| Moderate activity in past week       |             |            |            |            |            | <0.0001 |
| No                                   | 1205 (44.4) | 408 (39.8) | 230 (39.9) | 243 (47.0) | 324 (54.6) |         |
| Yes                                  | 954 (42.5)  | 461 (53.6) | 192 (45.0) | 134 (32.5) | 167 (29.4) |         |
| Missing                              | 547 (13.0)  | 116 (6.6)  | 138 (15.1) | 154 (20.6) | 139 (16.0) |         |
| Alcohol intake frequency             |             |            |            |            |            | <0.0001 |
| Non-drinker (no intake in past year) | 522 (16.0)  | 197 (14.8) | 105 (16.1) | 101 (19.7) | 119 (15.0) |         |
| Less than once a week                | 1006 (40.4) | 388 (39.6) | 193 (39.5) | 177 (38.8) | 248 (44.1) |         |
| Once a week or more frequent         | 587 (29.1)  | 262 (36.9) | 115 (28.4) | 90 (19.1)  | 120 (24.5) |         |
| Missing                              | 591 (14.5)  | 138 (8.7)  | 147 (16.1) | 163 (22.4) | 143 (16.5) |         |

Journal Pre-proof
